# Supplementary material for: Multi-Modal Compositional Analysis of Layered Paint Chips of Automobiles by the Combined Application of ATR-FTIR Imaging, Raman Microspectrometry, and SEM/EDX
Source: PubMed Central journal article supplement (PMC6479518; doi:10.3390/molecules24071381), 2019-04-08

## Supplementary Information for publication

### **Multi-modal compositional analysis of layered paint chips of automobiles by the combined application of ATR-FTIR imaging, Raman microspectrometry, and SEM/EDX**

Md Abdul Malek<sup>a</sup>, Takashi Nakazawa<sup>b</sup>, Hyun-Woo Kang<sup>a</sup>, Kouichi Tsuji<sup>b</sup>, and Chul-Un Ro<sup>a,\*</sup>

a Department of Chemistry, Inha University, Incheon 22212, Korea

b Graduate School of Engineering, Osaka City University, Osaka 558-8585, Japan

\* Correspondence to: C.-U. Ro, Department of Chemistry, Inha University, Incheon 22212, Korea. Phone: +82 10 6381 1400 and Fax:

+82 32 867 5604. E-mail: curo@inha.ac.kr

#### **A summary of content of the supplementary information:**

- Number of pages: pp. S1- S16
- Figures S1 to S15: pp. S2 – S16.

Figure S1. Representative ATR-FTIR spectra of layers #1, #2, #4, and #5 of sample A in comparison with two library spectra showing the best match. Peak notations are ↓: alkyd, ♥: melamine, and ∇: PAP.

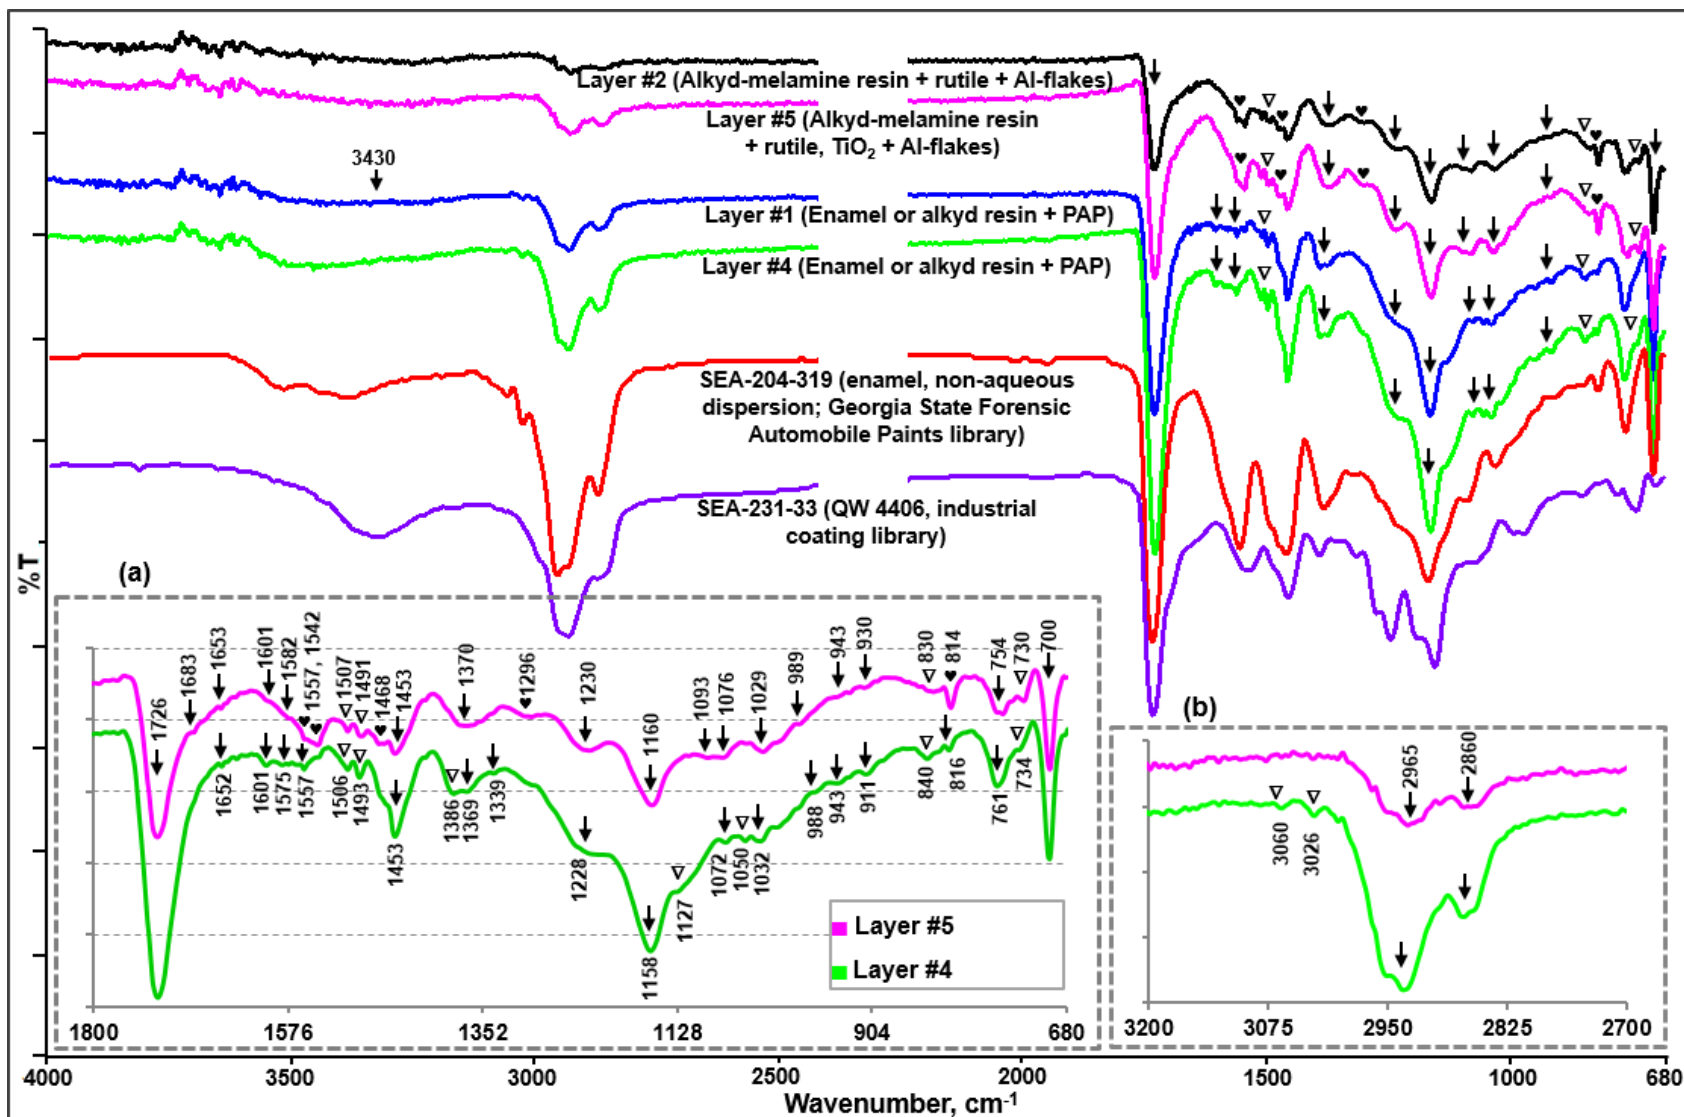

Figure S2. Representative Raman spectra of layers #2, #3, #6 and #7 of sample A (magnified in an inset over 750 – 1800  $\text{cm}^{-1}$ ) compared with that of standard rutile, anatase, and kaolinite. Peak notations are  $\star$ : rutile ( $\text{TiO}_2$ );  $\nabla$ : anatase ( $\text{TiO}_2$ )

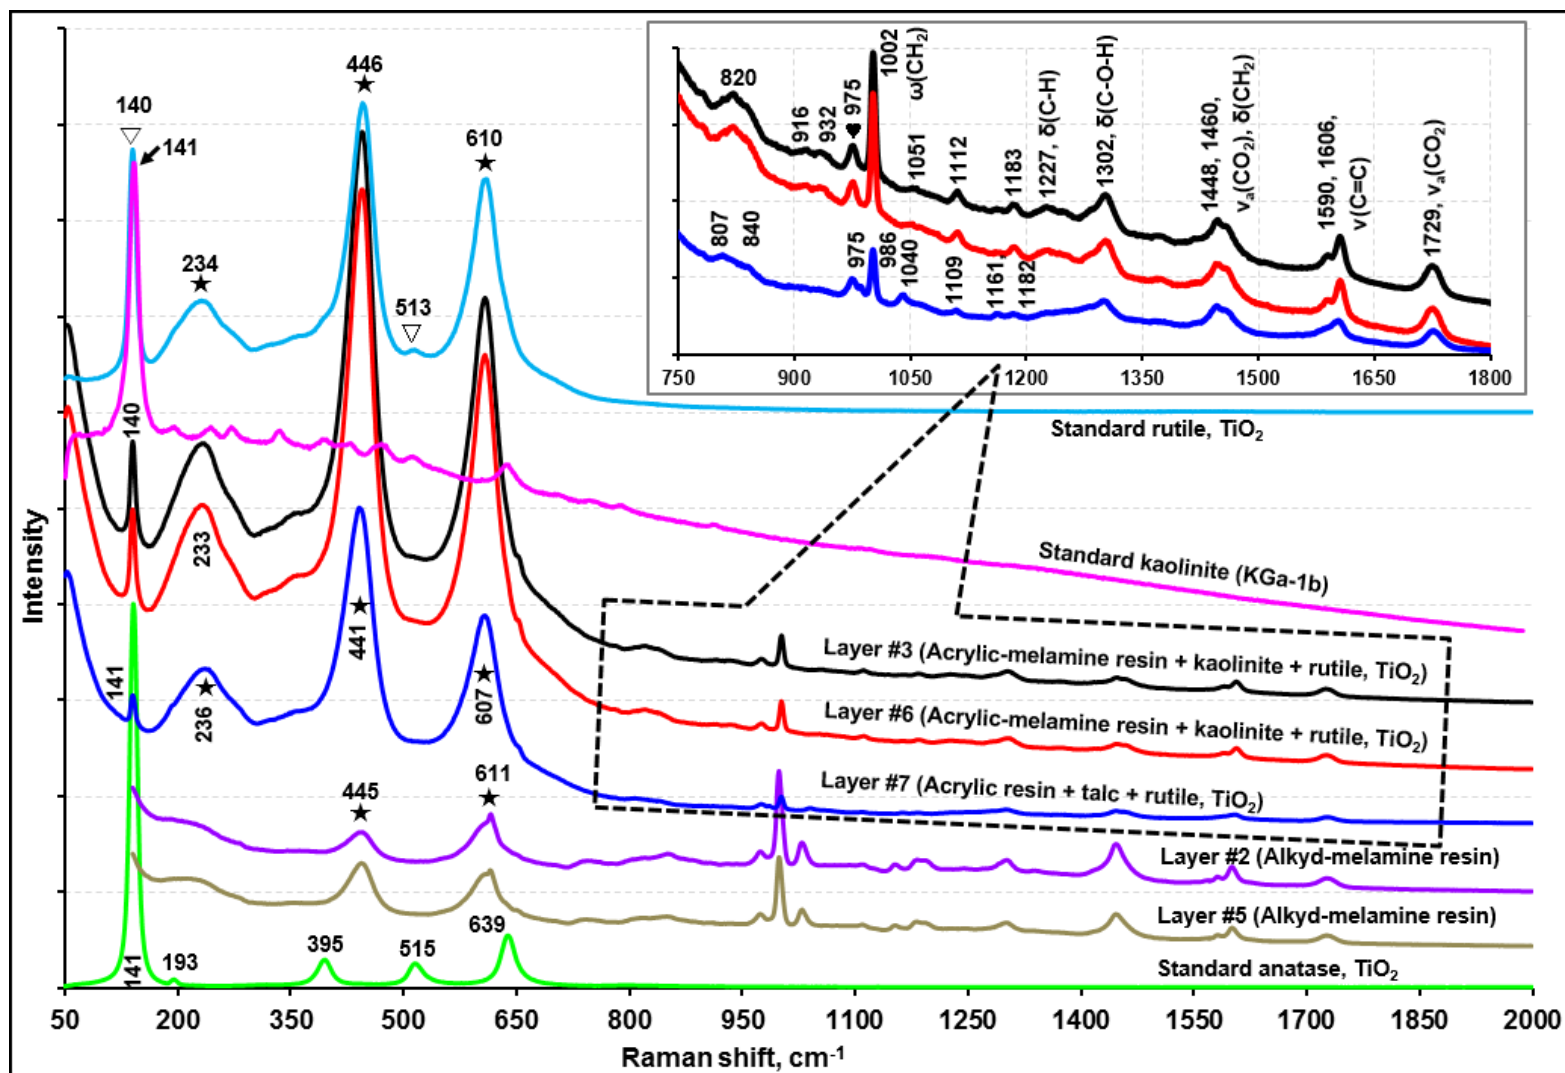

Figure S3. Representative ATR-FTIR spectra of layers #3, #6, and #7 of sample A in comparison with two library spectra showing the best match. The peak notations are  $\diamond$ : acrylic,  $\heartsuit$ : melamine,  $\blacklozenge$ : kaolinite, and  $\star$ :  $\text{TiO}_2$ .

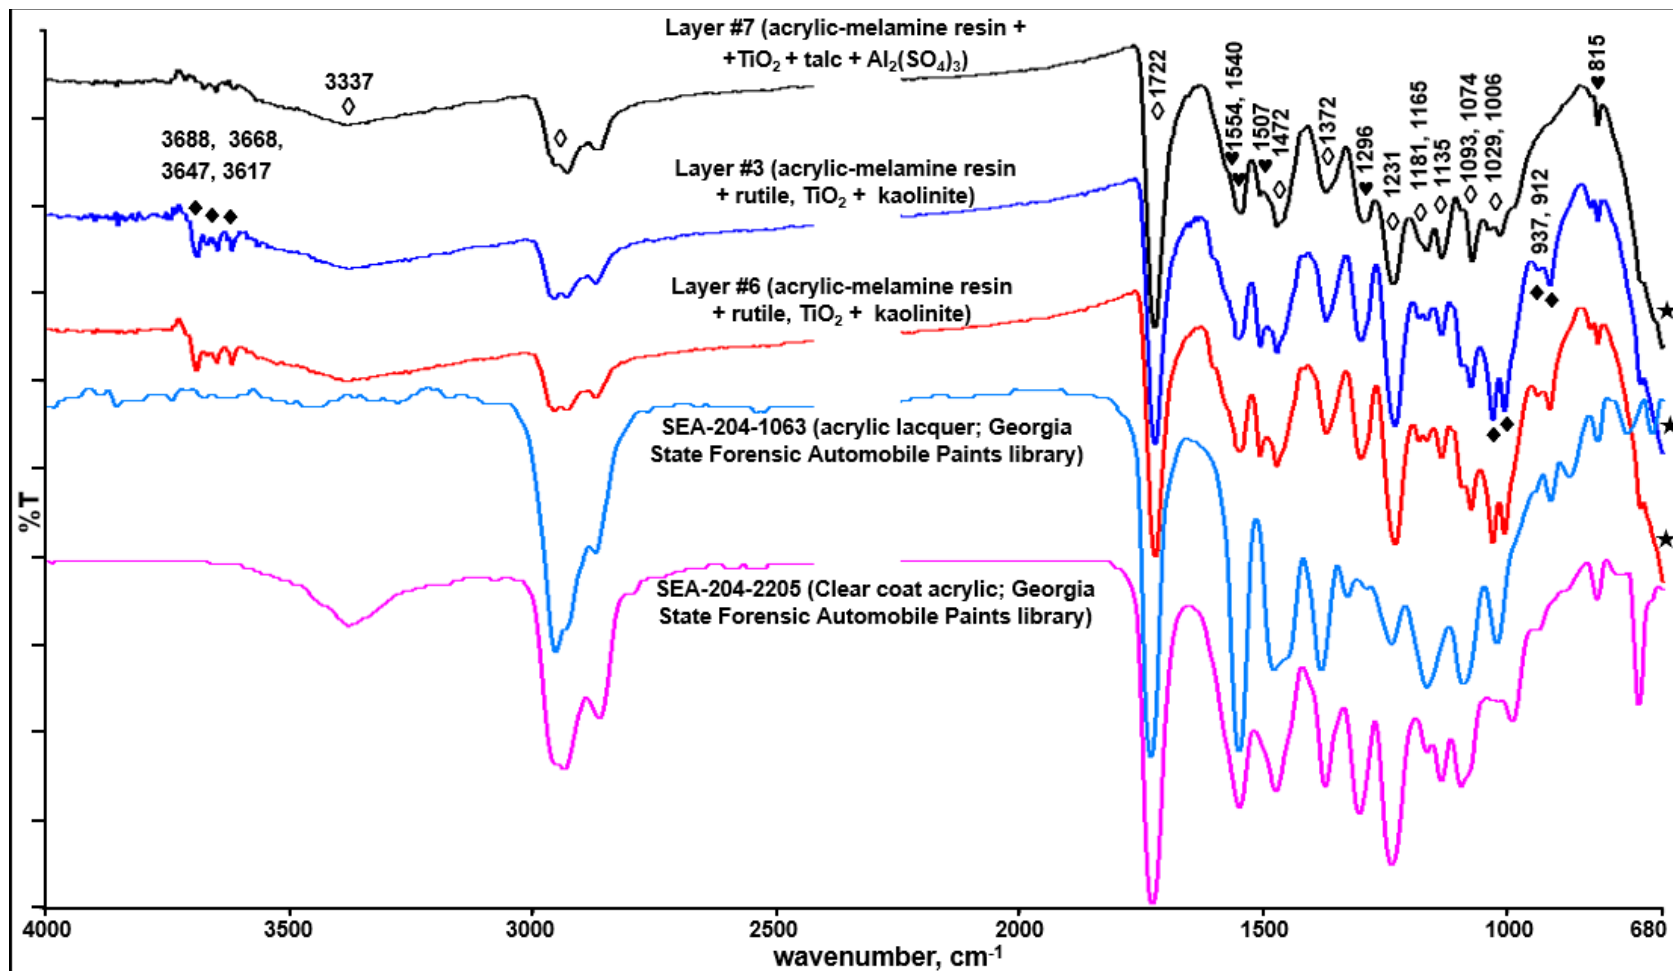

Figure S4. ATR-FTIR spectra of layers #3, #6, and #7 of sample A and standard kaolinite, talc, and rutile (TiO<sub>2</sub>). The peak notations are  $\diamond$  : acrylic,  $\heartsuit$ : melamine,  $\blacklozenge$ : kaolinite,  $*$ : TiO<sub>2</sub>,  $\blacktriangle$ : talc, and  $\triangle$ : SO<sub>4</sub><sup>2-</sup>.

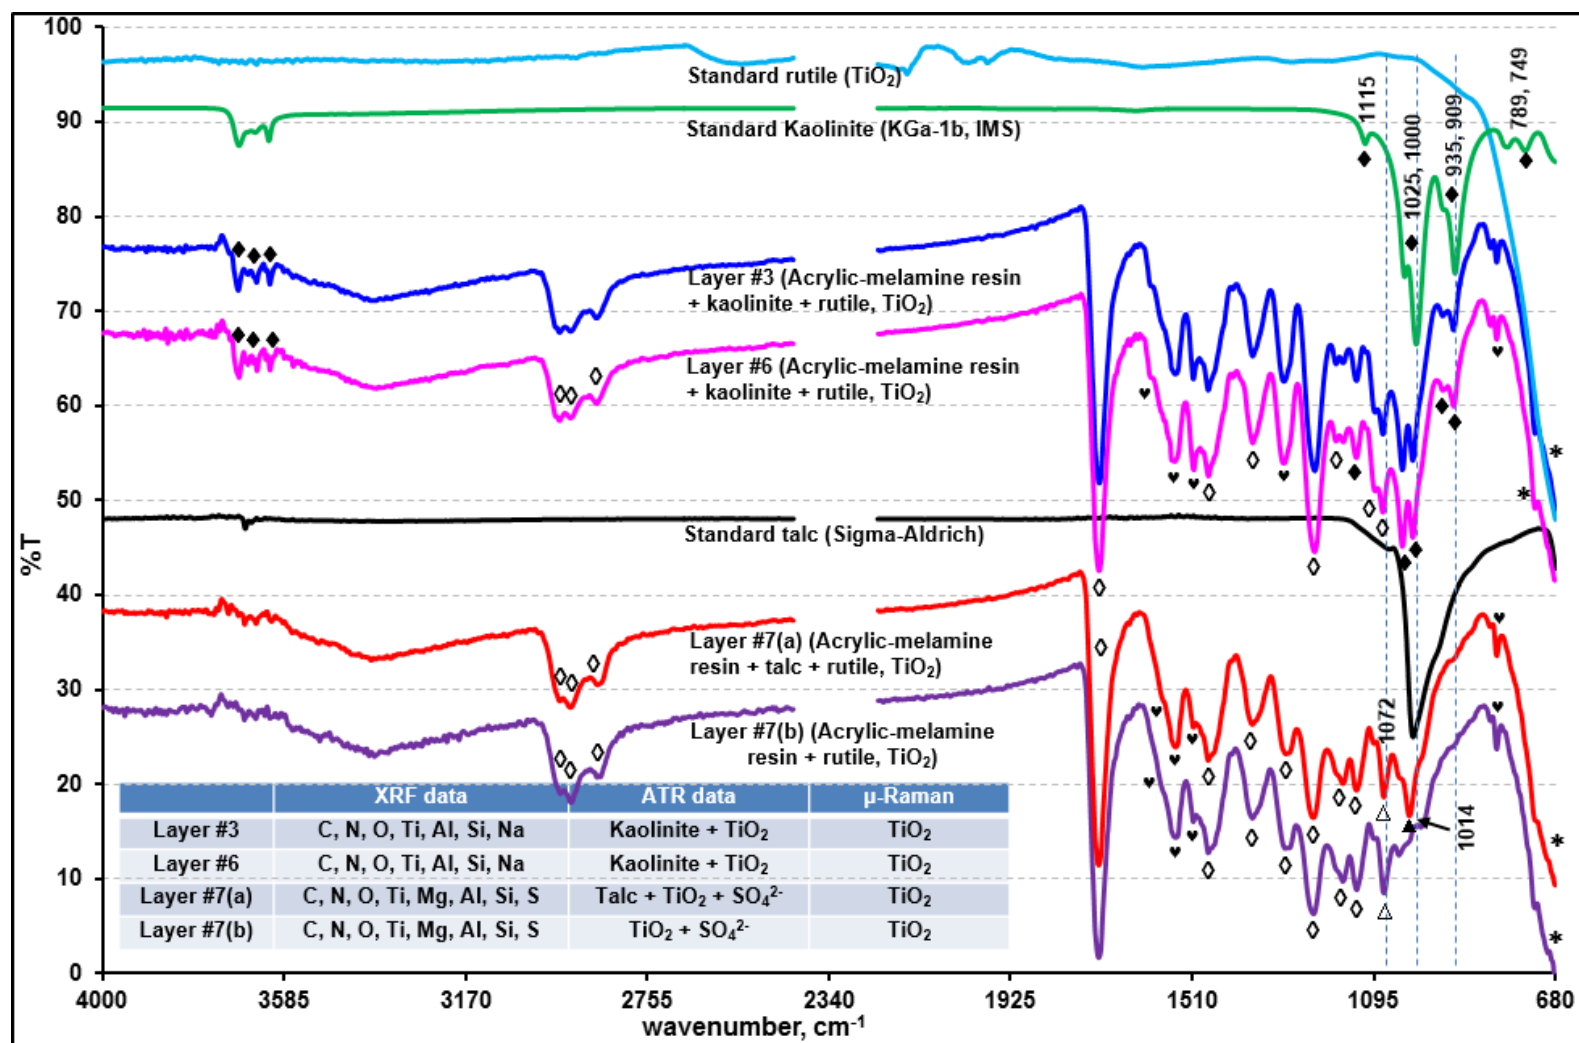

Figure S5. (a) Two pairs of X-ray spectra for layers #3 and #6 of sample A, showing that Ti peak intensities increase as Al and Si decrease and vice versa and (b)-(d) X-ray spectra obtained at various locations in layers #7-#9 of sample A.

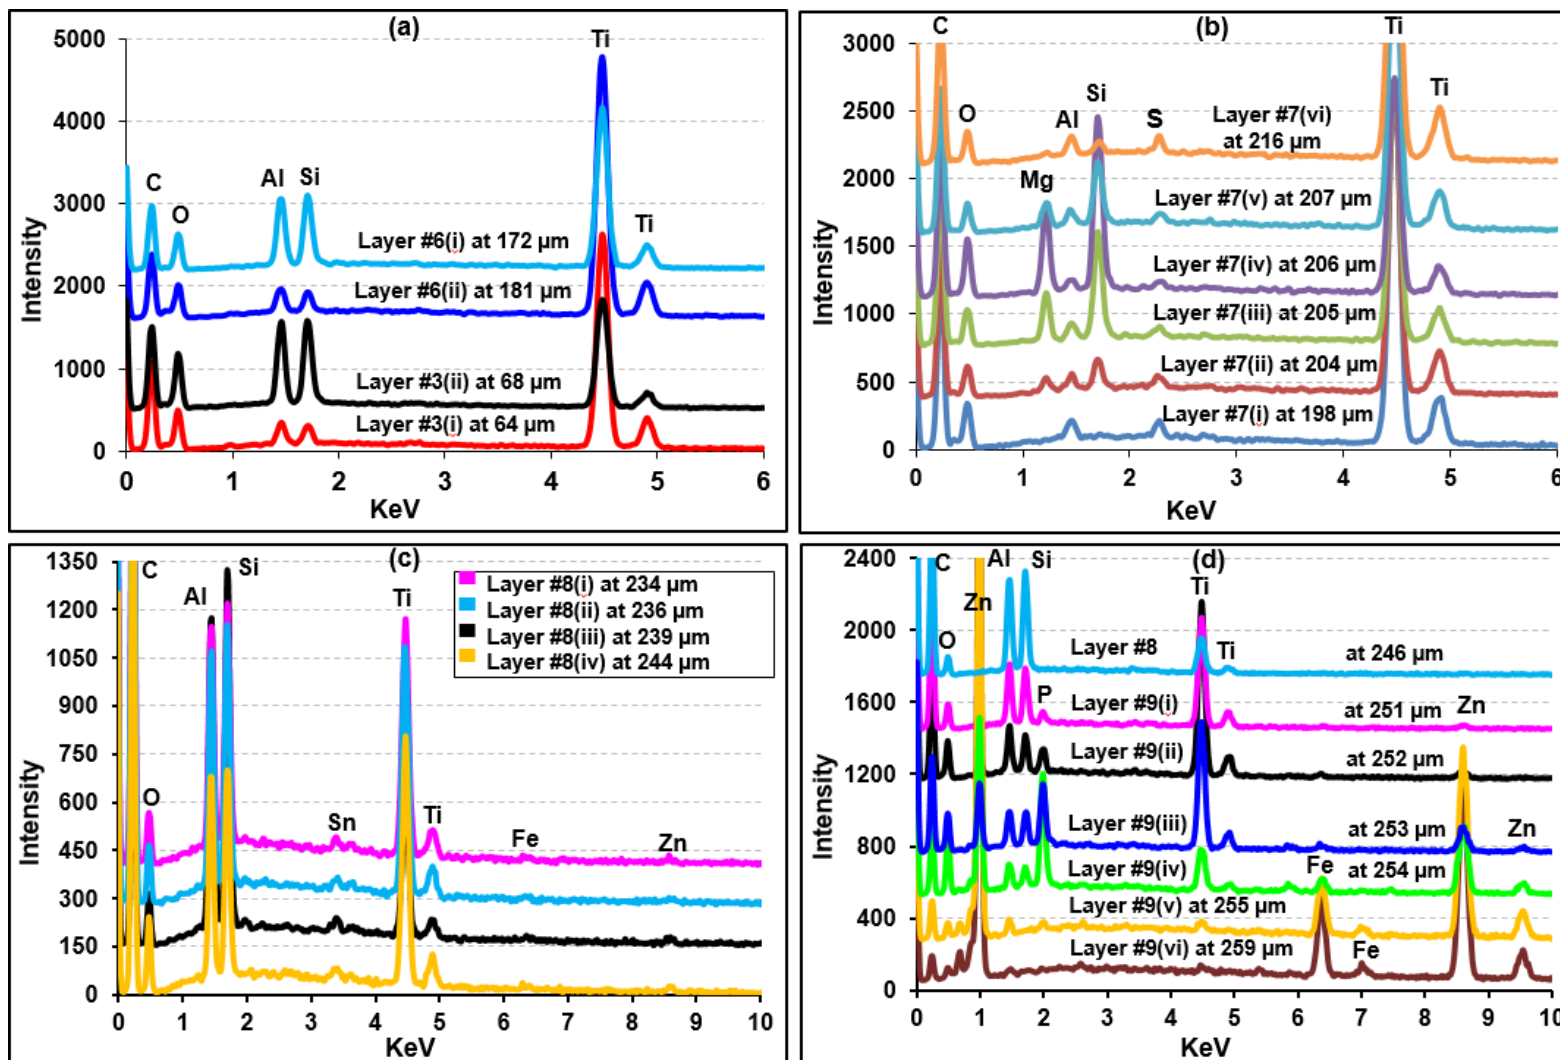

Figure S6. Representative ATR-FTIR spectra of layers #8 and #9 of sample A in comparison with a spectrum of the resin mold used for the cross-section preparation and two library spectra of epoxy resins with and without carbonyl peak at  $\sim 1730\text{ cm}^{-1}$ . [\*DGEBA: Diglycidyl ether of bisphenol-A]

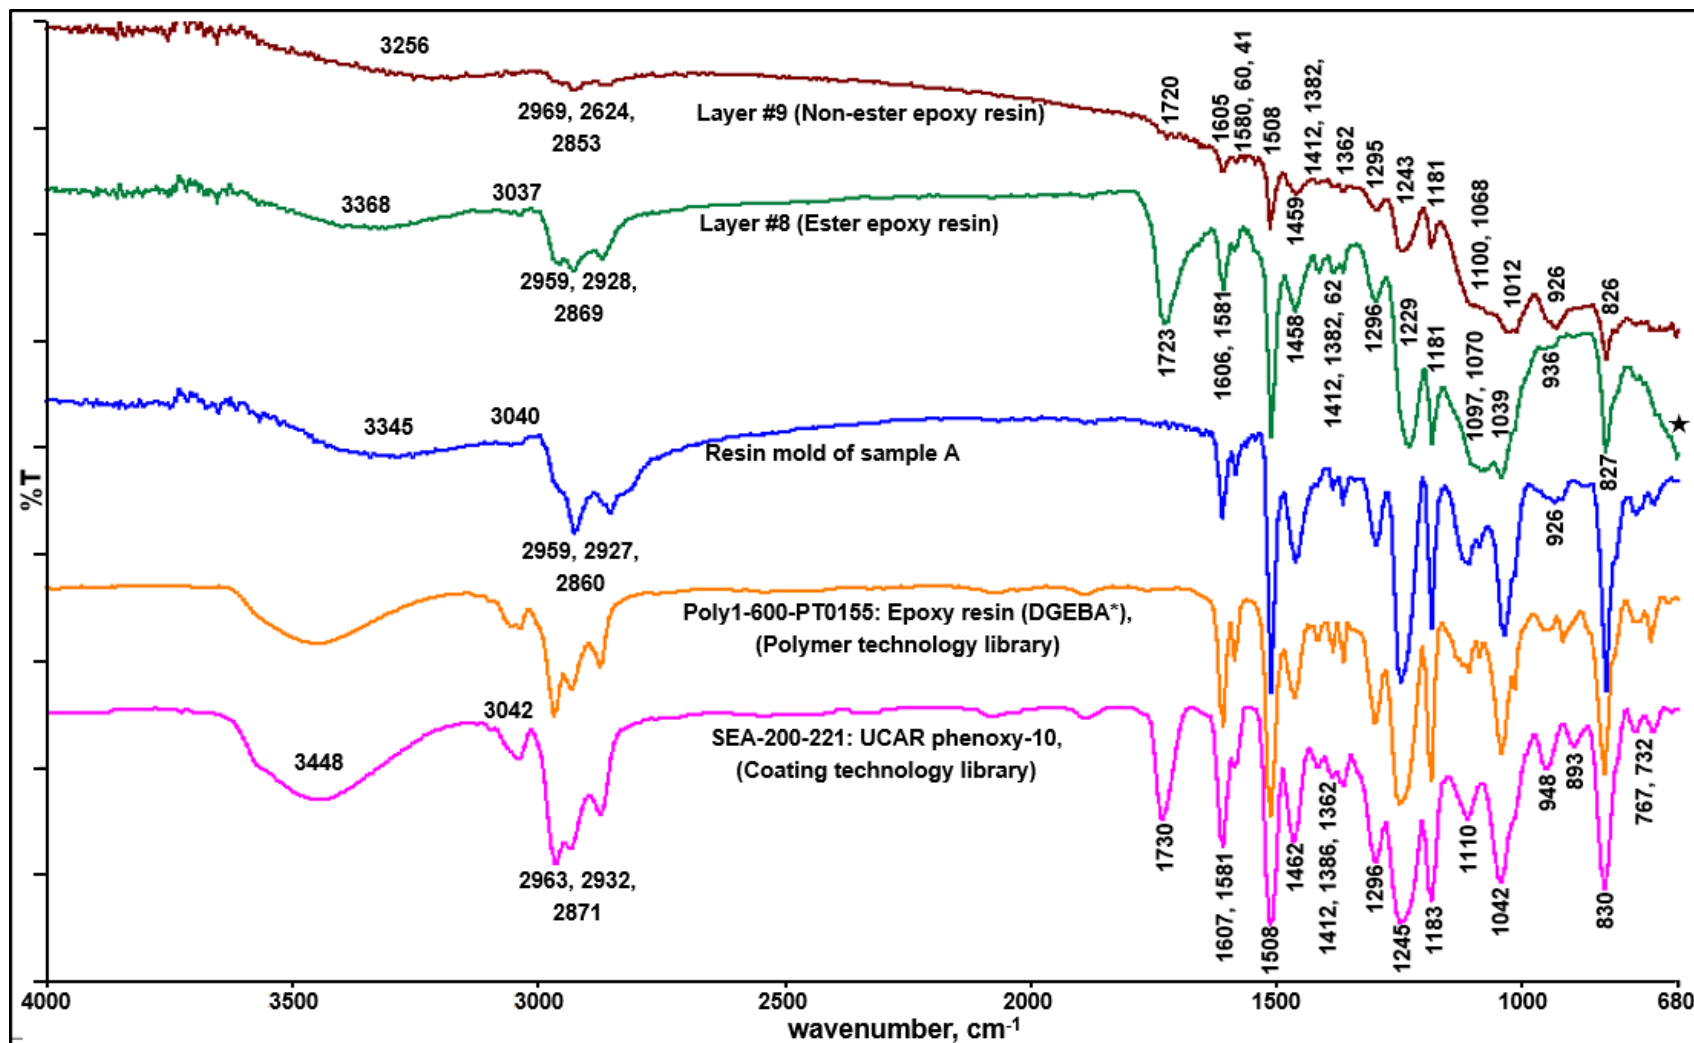

Figure S7. ATR-FTIR spectra of layers #8 and #9 of sample A in comparison with those of the resin mold used for cross-section preparation and standard kaolinite, pyrophyllite, and  $Zn_3(PO_4)_2$ .

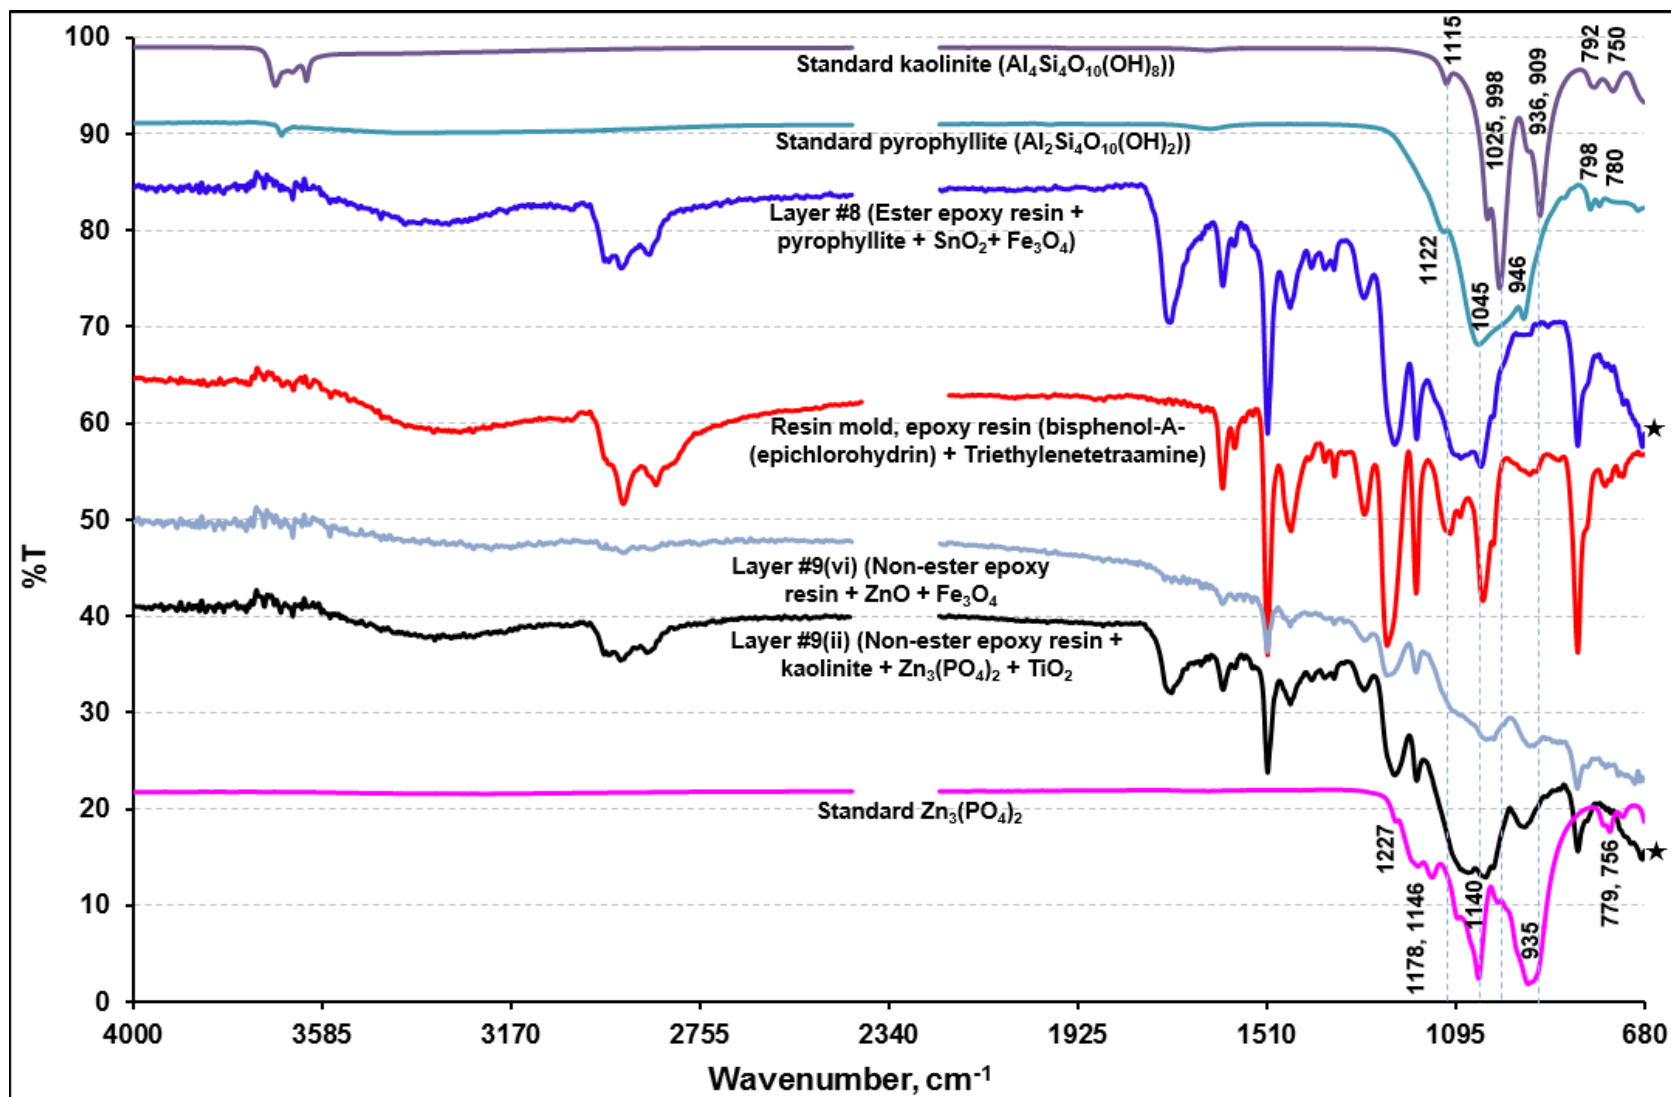



Figure S8. Representative Raman spectra of layers #8 and #9 of sample A in comparison with standard  $\text{Fe}_3\text{O}_4$ .

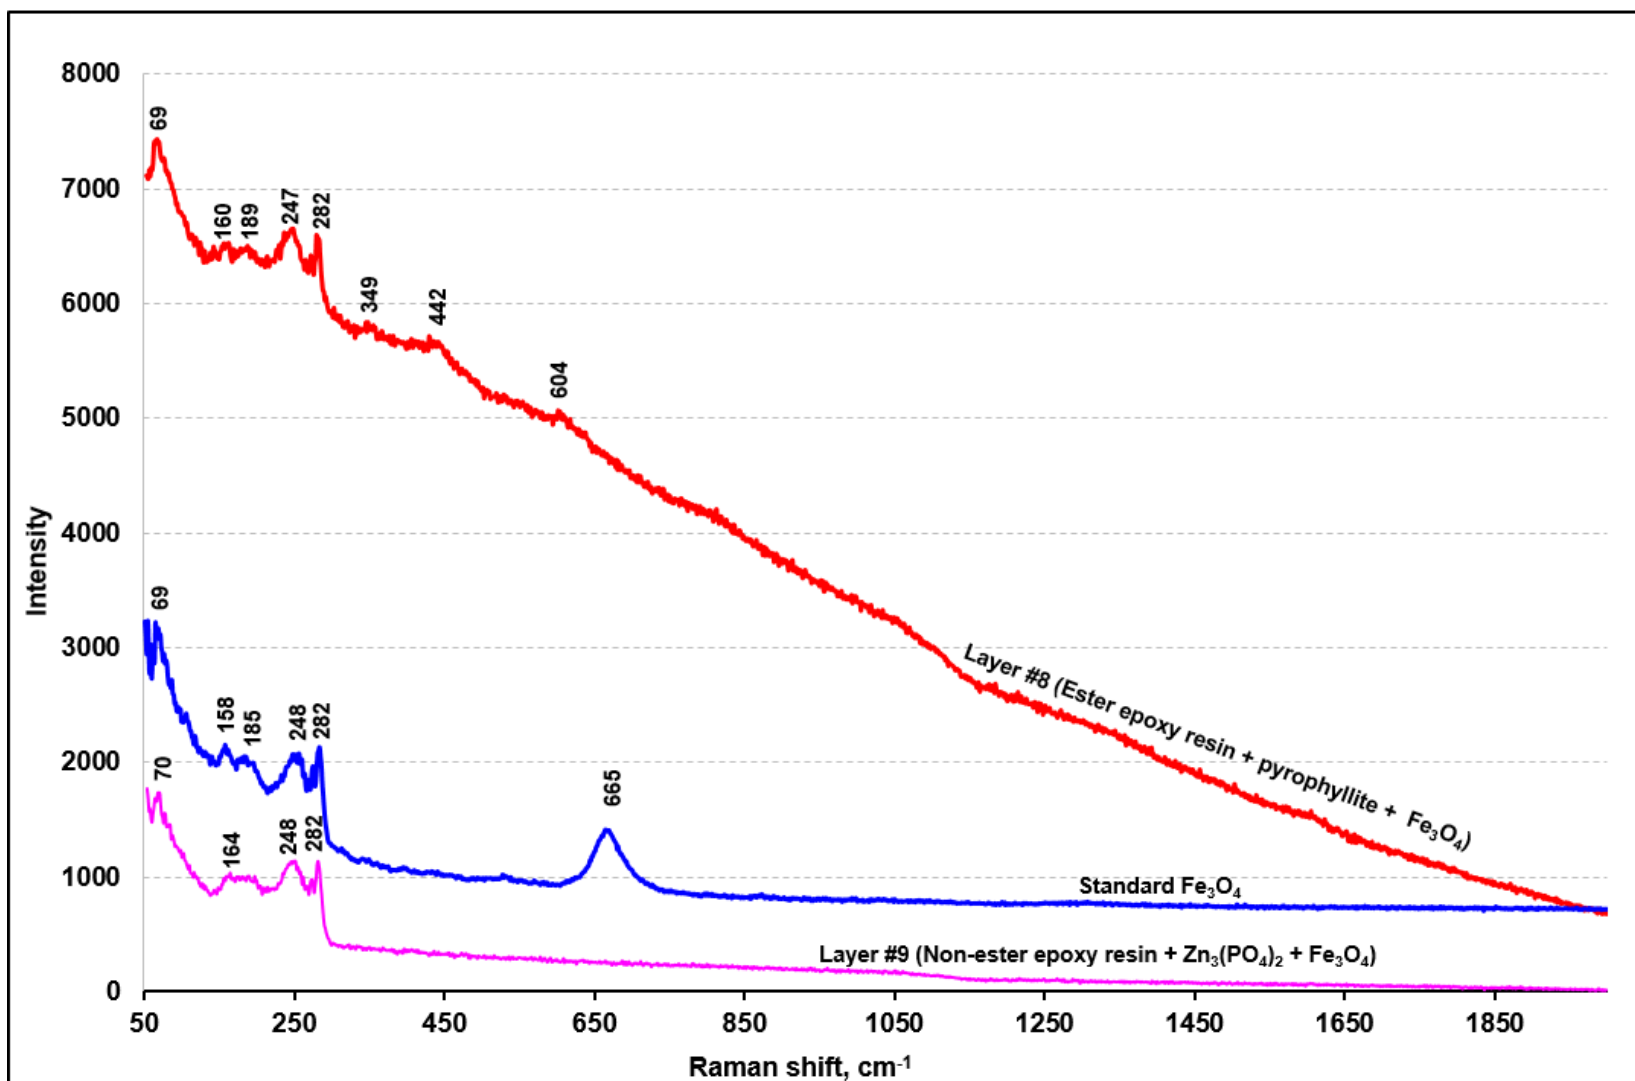

Figure S9. Plot of the baseline corrected ATR-FTIR spectra at successive pixels on a line across the boundary between layer #8 and #9 of sample A. ATR-FTIR spectra of standard kaolinite, pyrophyllite, and  $Zn_3(PO_4)_2$  are included for comparison.

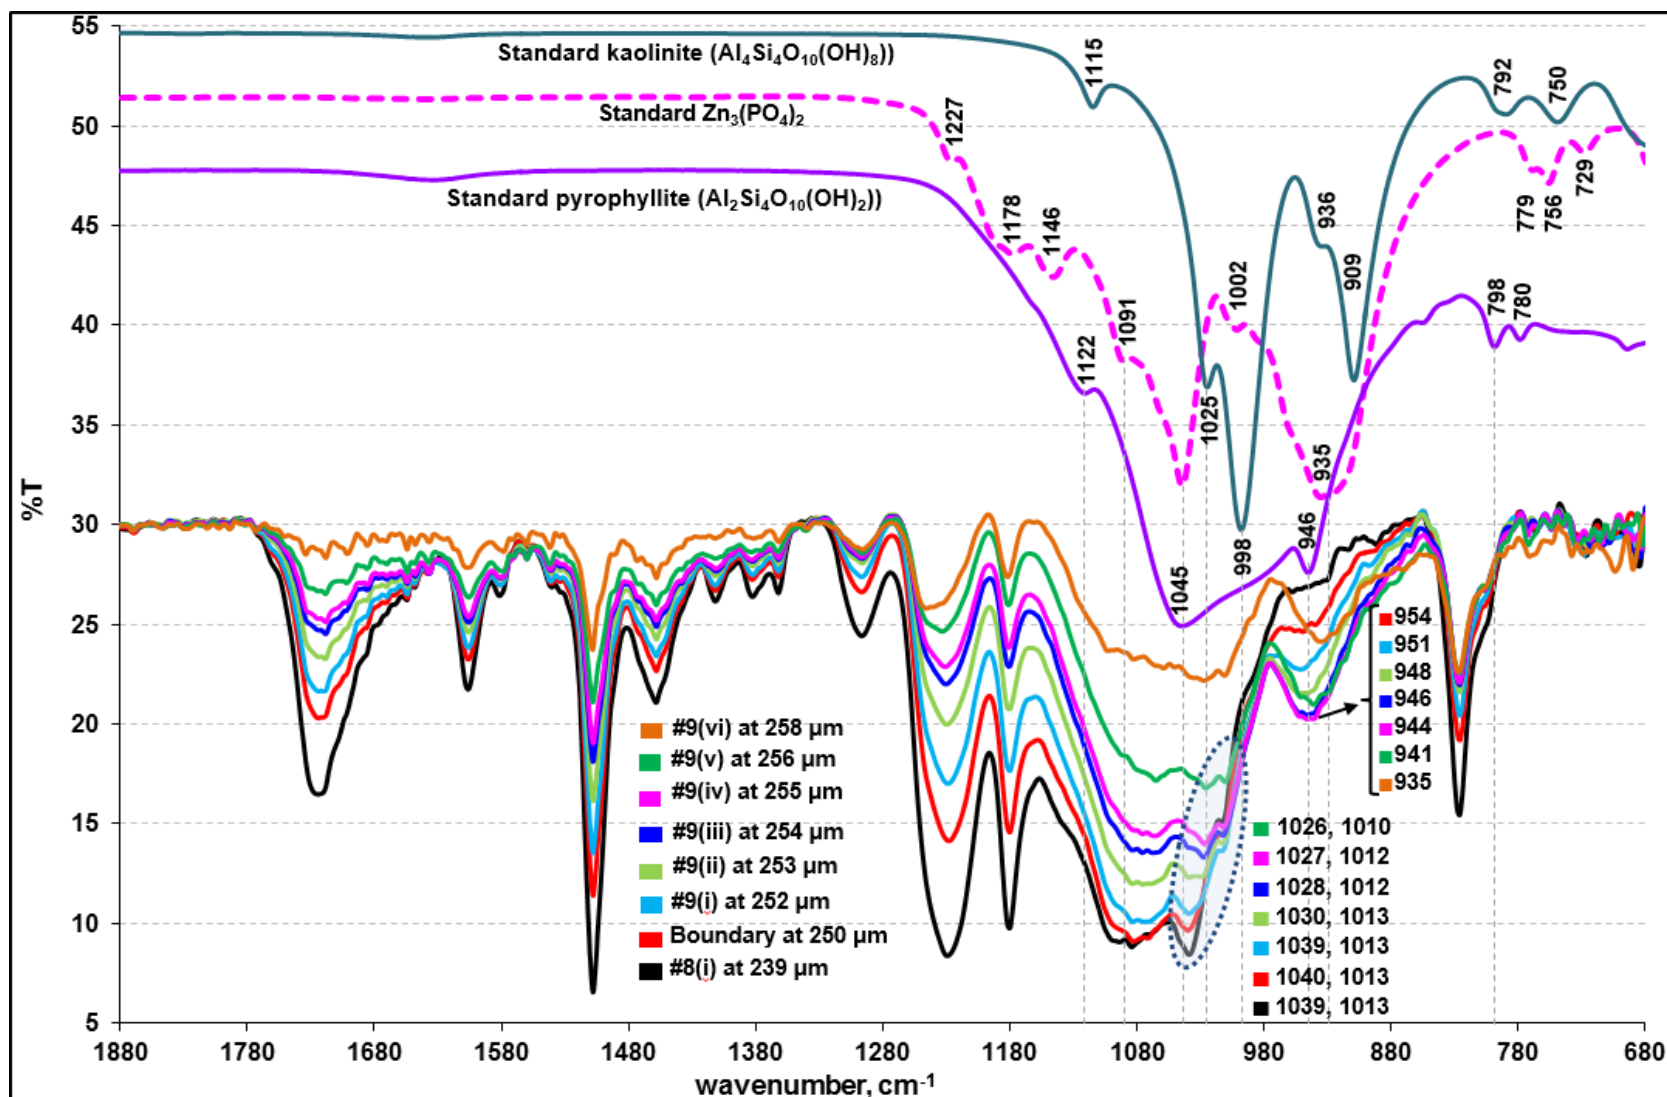

Figure S10. Representative ATR-FTIR spectra of layer #1 of sample B in comparison with a spectrum of the resin mold used for cross-section preparation, standard kaolinite, and two library spectra showing the best match. The peak notations are ↓: epoxy, ◆: kaolinite, and ★: rutile (TiO<sub>2</sub>).

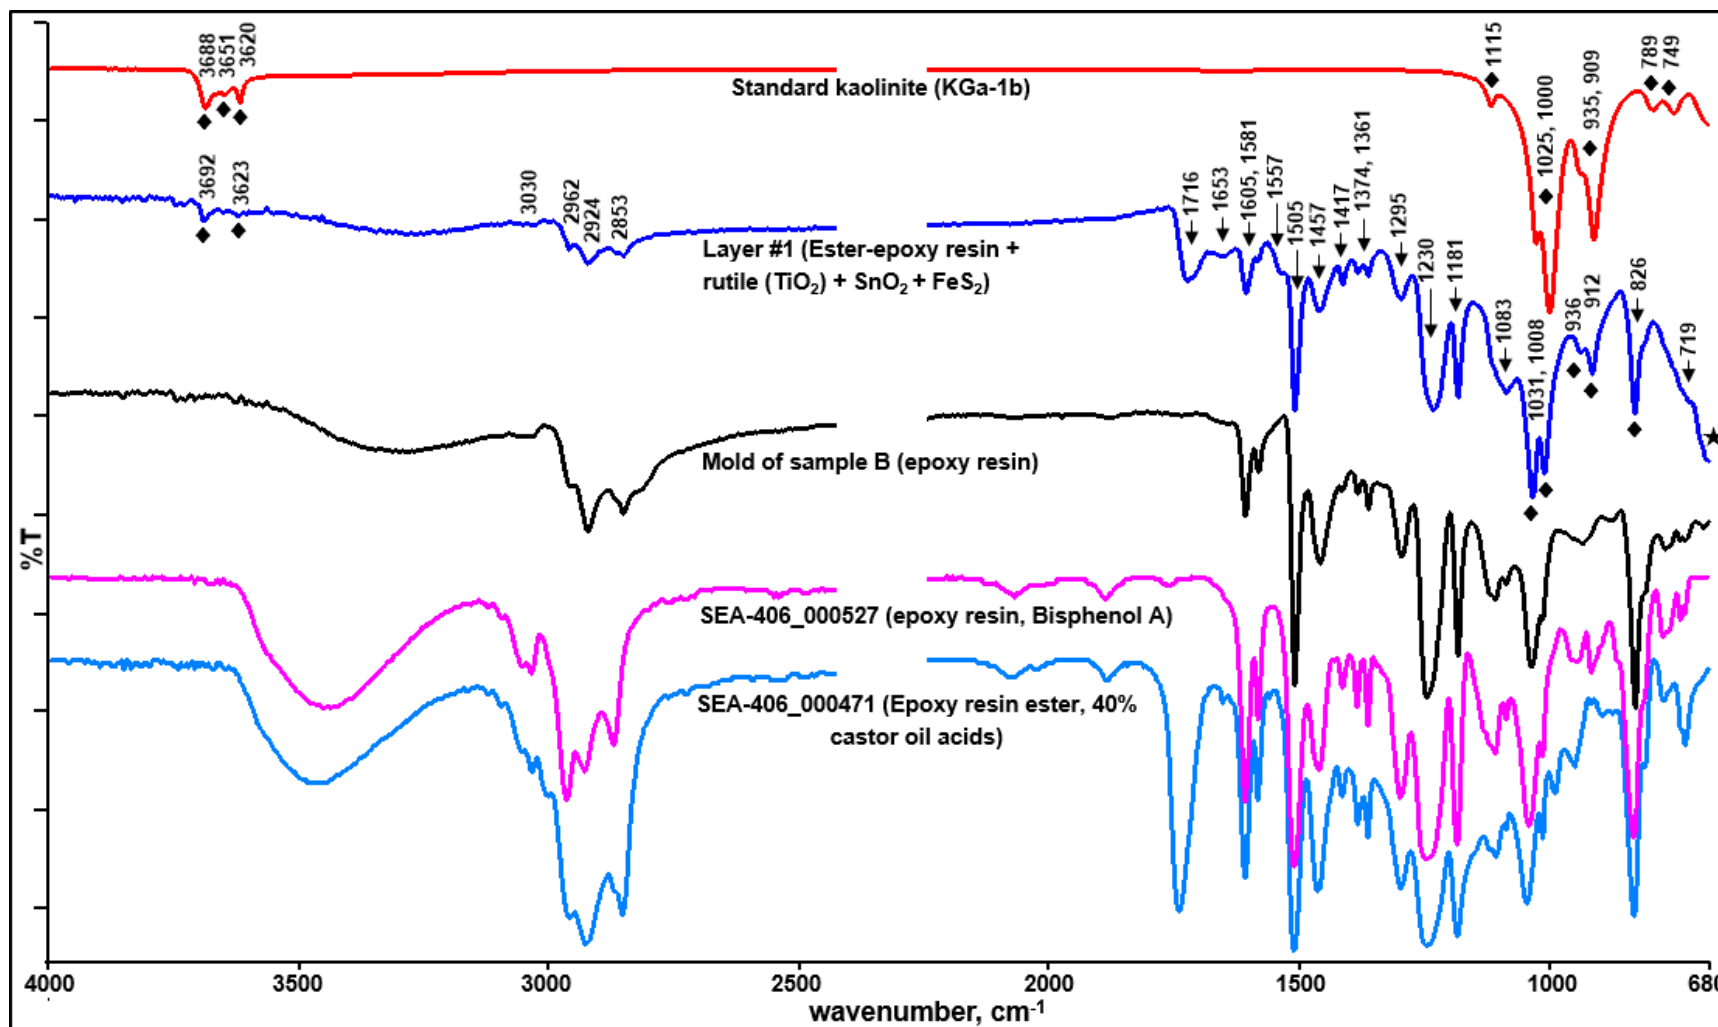

Figure S11. Representative ATR-FTIR spectra of layers #2, #3, and #4 of sample B in comparison with a spectrum of standard BaSO<sub>4</sub> and three library spectra showing the best match. The peak notations are ↓: alkyd, ♥: melamine, ★: TiO<sub>2</sub>, and S: SO<sub>4</sub><sup>2-</sup>.

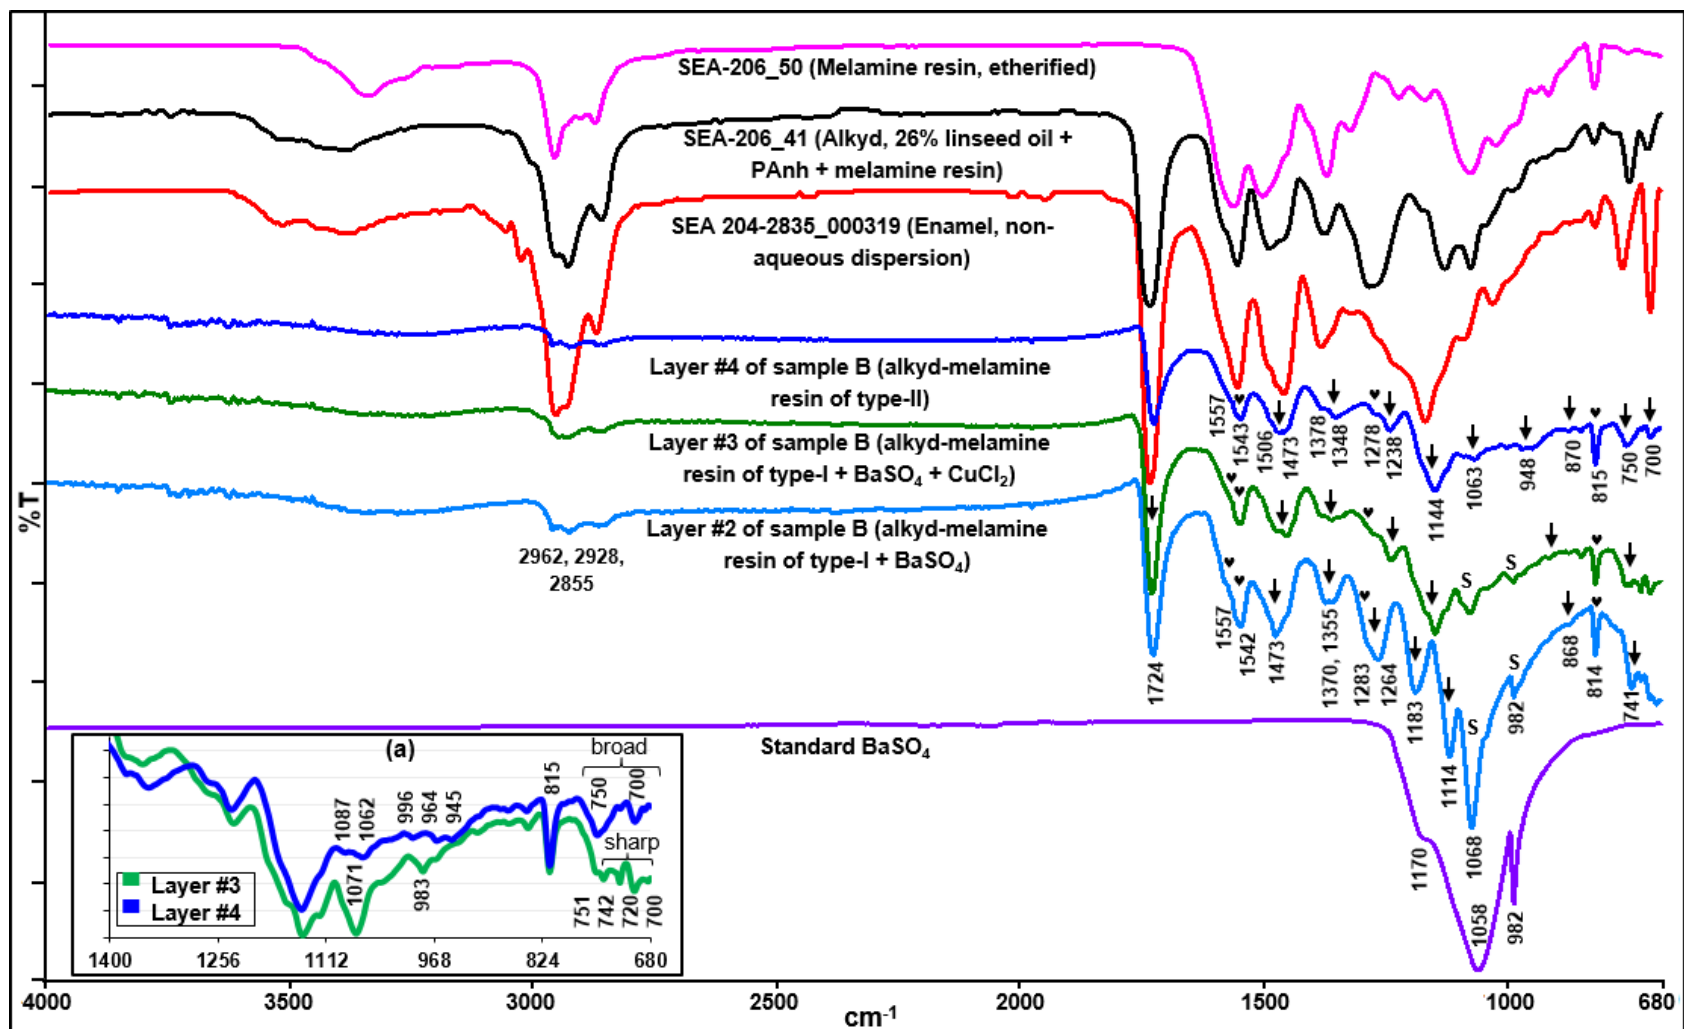

Figure S12. Representative ATR-FTIR spectrum of layer #5 of sample B and three library spectra showing the best match.

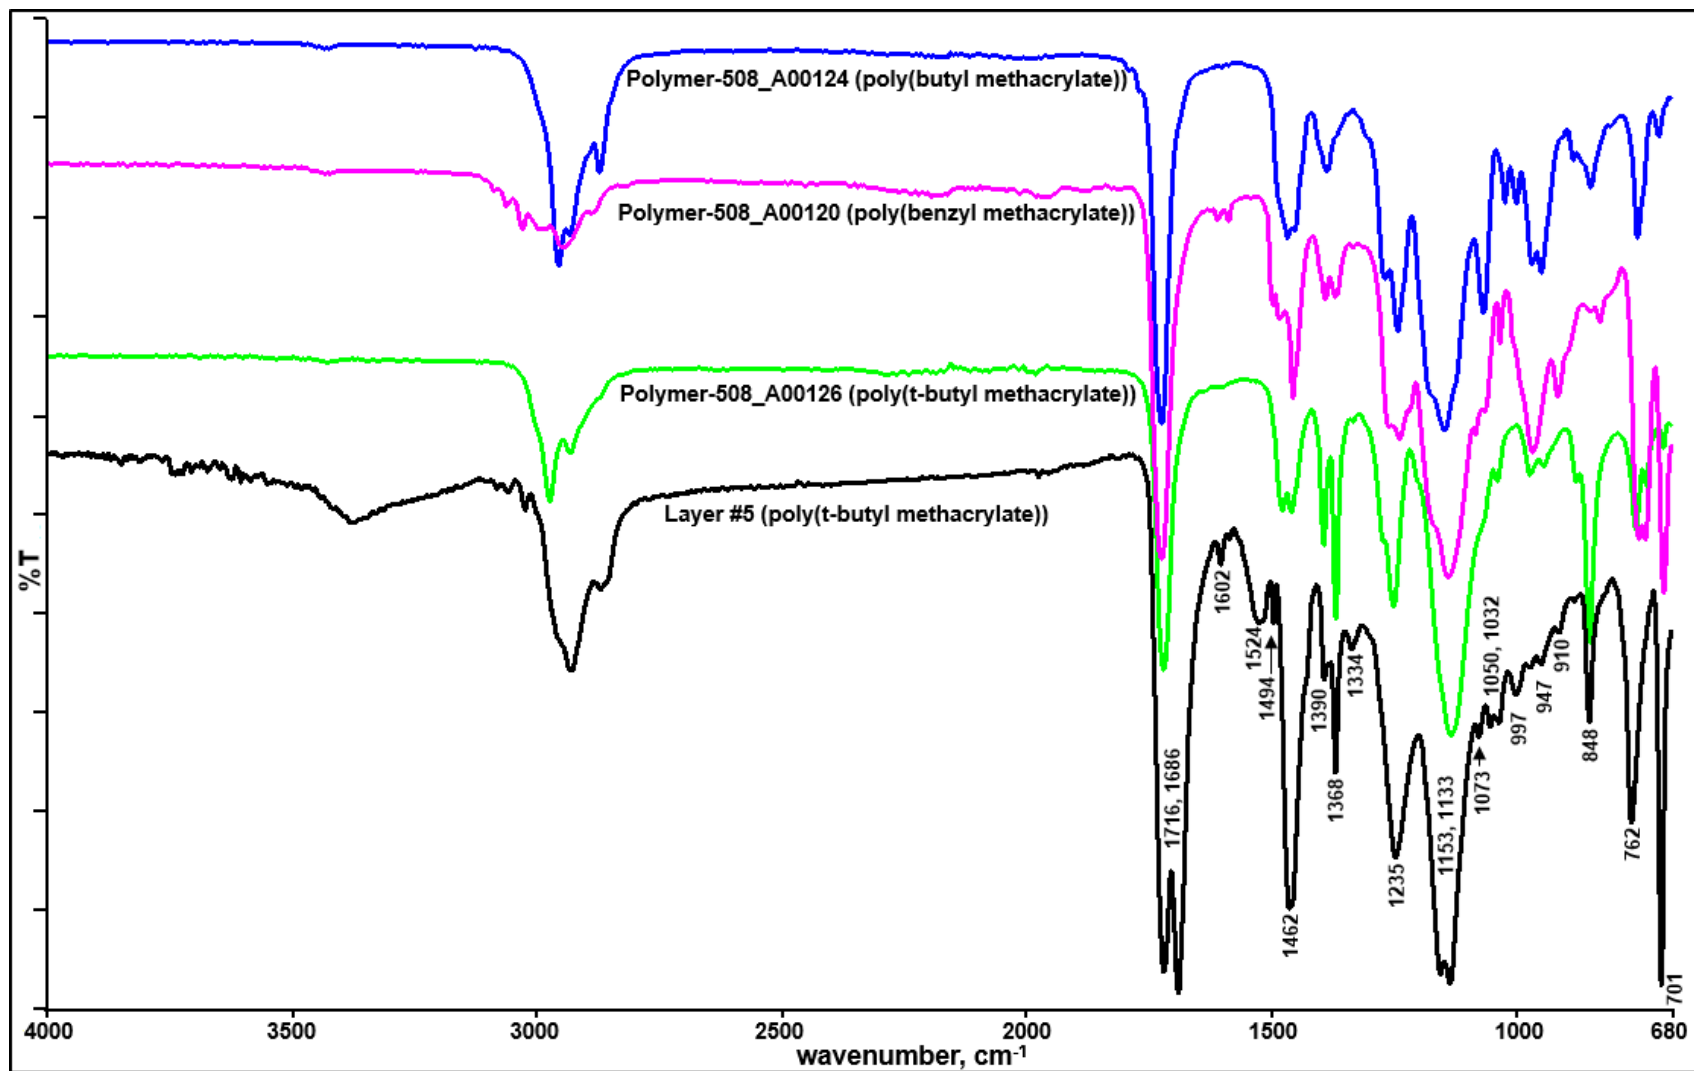

Figure S13. Representative ATR-FTIR spectra of layers #1 and #2 of sample C and two library spectra showing the best match.

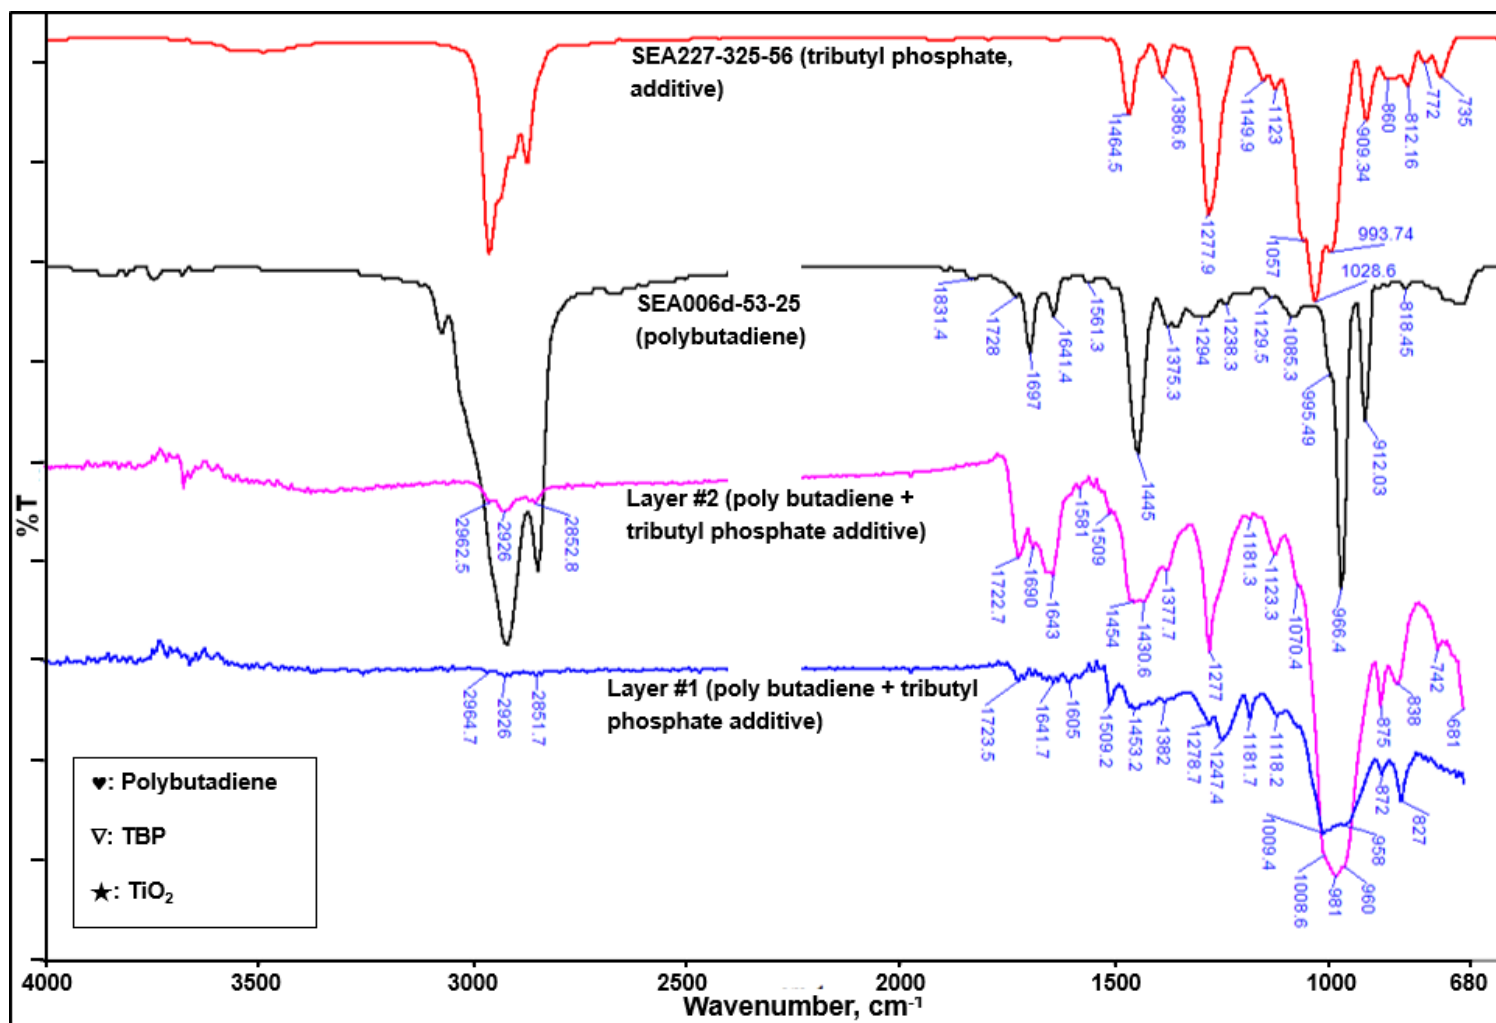

Figure S14. ATR-FTIR spectra at different locations within layers #1 and #2 of sample C in comparison with those of standard talc and CaCO<sub>3</sub>. The peak notations are ↓: poly butadiene, ◆: TBP, ★: rutile (TiO<sub>2</sub>), C: CaCO<sub>3</sub>, and T: talc.

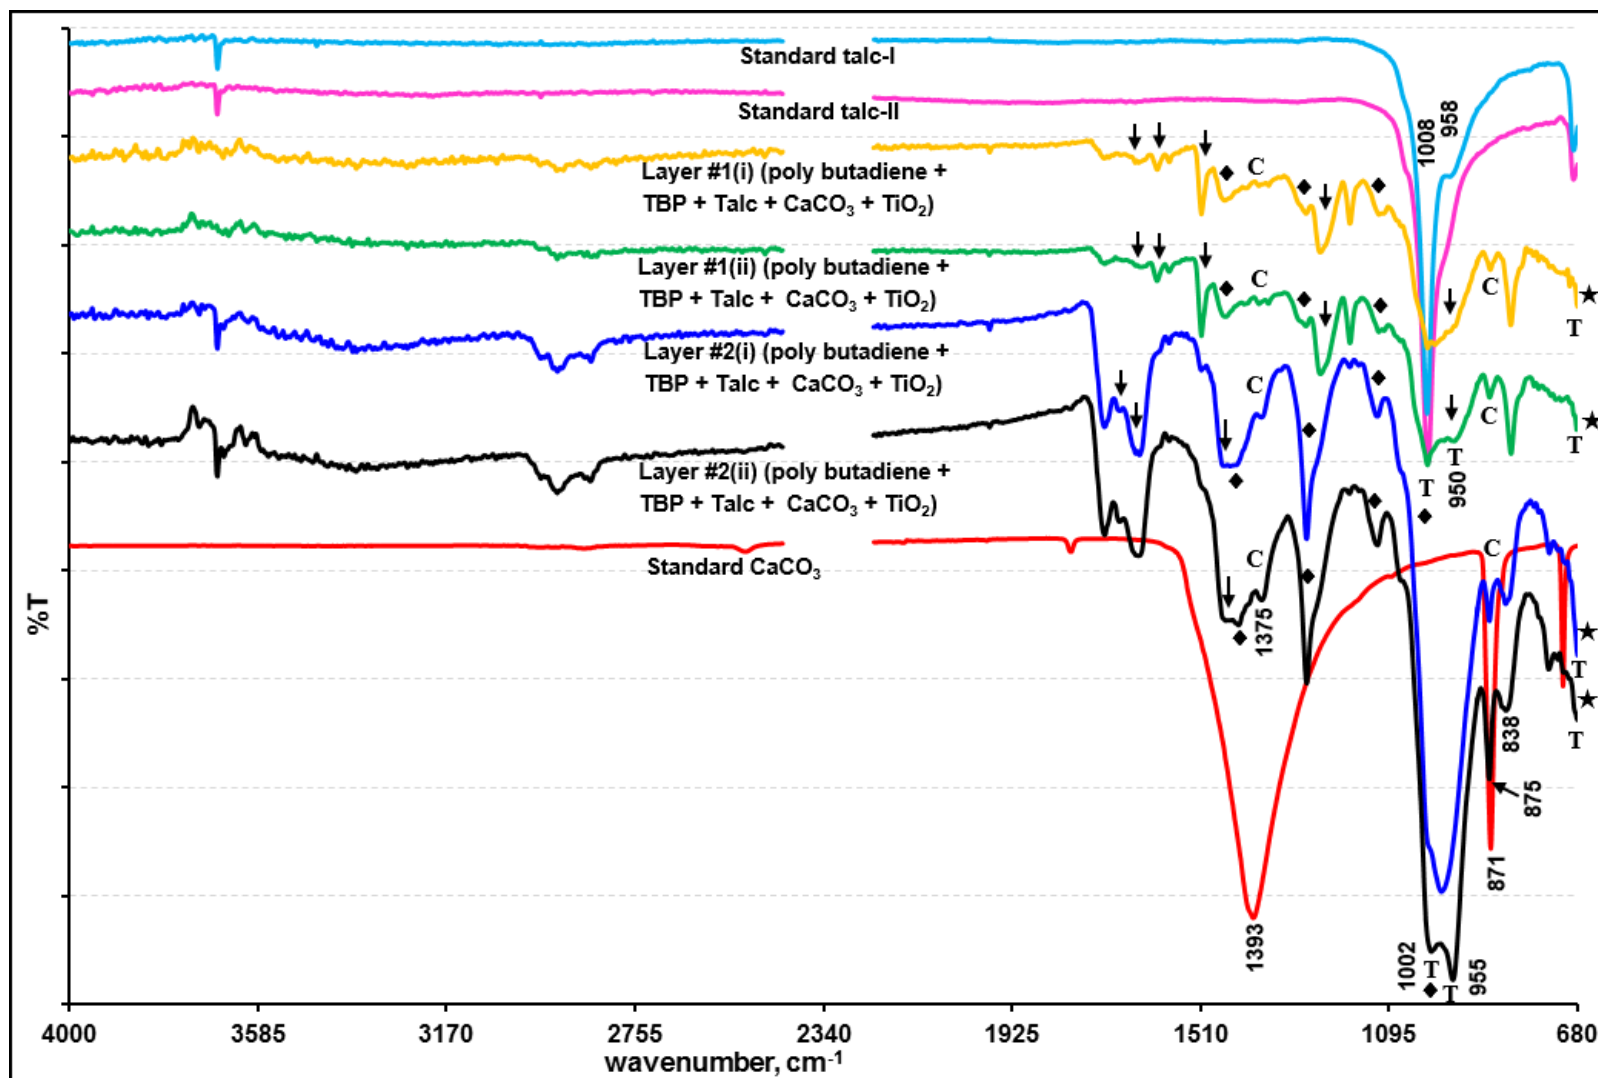

Figure S15. Representative ATR-FTIR spectra of layers #3 and #4 of sample C and one library spectrum showing the best match.

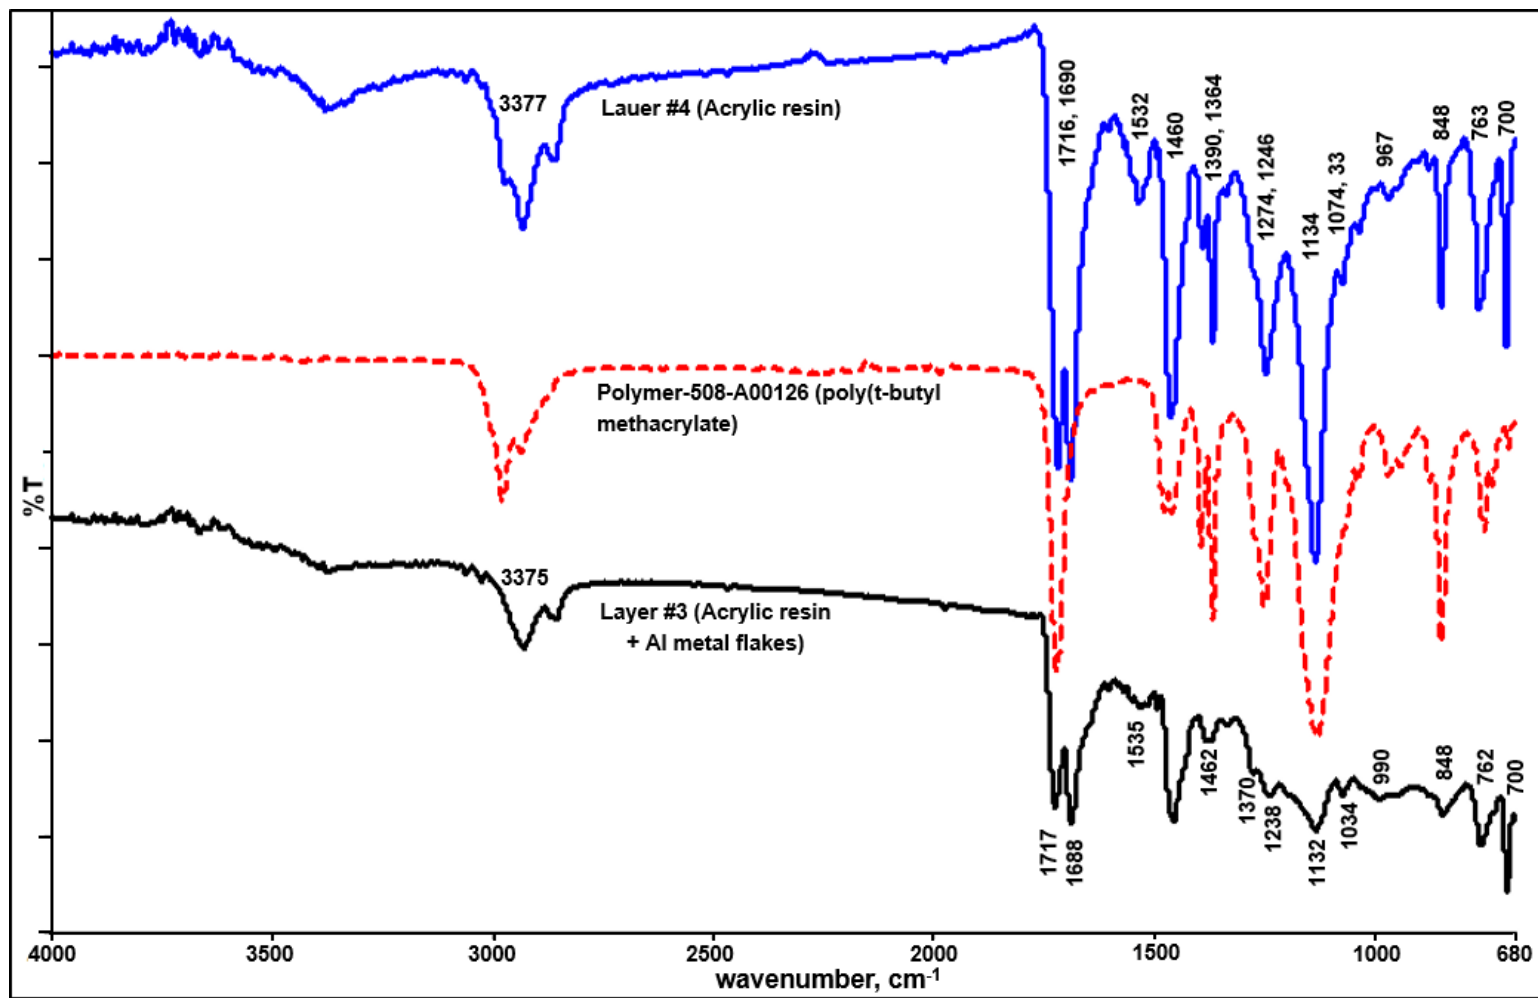

Supplement: molecules-24-01381-s001.pdf [file molecules-24-01381-s001.pdf]
